# Supplementary material
Source: PubMed Central journal article supplement (PMC7598766)
Supplement: mmc1.pdf [file mmc1.pdf]

**Suppl. Table 1** Quality ratings of included studies according to the National Institutes of Health (NIH) quality assessment tool for case series/reports studies

| First author<br>(Reference No.) | Question* |     |    |     |    |     |    |     |     | Overall<br>quality rating |            |
|---------------------------------|-----------|-----|----|-----|----|-----|----|-----|-----|---------------------------|------------|
|                                 | 1         | 2   | 3  | 4   | 5  | 6   | 7  | 8   | 9   | Reviewer 1                | Reviewer 2 |
| Li et al.[38]                   | Yes       | Yes | CD | CD  | NA | Yes | CD | NA  | Yes | Fair                      | Fair       |
| Amin et al.[12]                 | Yes       | Yes | CD | CD  | NA | Yes | CD | NA  | Yes | Fair                      | Fair       |
| Doroudinia et al.[13]           | Yes       | Yes | CD | CD  | NA | Yes | CD | NA  | Yes | Fair                      | Fair       |
| Mo et al.[39]                   | Yes       | Yes | CD | CD  | NA | Yes | CD | NA  | Yes | Fair                      | Fair       |
| Loforte et al.[40]              | Yes       | Yes | CD | CD  | NA | Yes | CD | NA  | Yes | Fair                      | Fair       |
| Kamani et al.[23]               | Yes       | Yes | CD | CD  | NA | Yes | CD | NA  | Yes | Fair                      | Fair       |
| Liu et al.[41]                  | Yes       | Yes | CD | CD  | NA | Yes | CD | NA  | Yes | Fair                      | Fair       |
| Qin et al.[42]                  | Yes       | Yes | NR | Yes | NA | Yes | CD | NA  | Yes | Fair                      | Fair       |
| Sherman et al.[45]              | Yes       | Yes | CD | CD  | NA | Yes | CD | NA  | Yes | Fair                      | Fair       |
| Polverari et al.[46]            | Yes       | Yes | CD | CD  | NA | Yes | CD | NA  | Yes | Fair                      | Fair       |
| Amini et al.[47]                | Yes       | Yes | CD | CD  | NA | Yes | CD | NA  | Yes | Fair                      | Fair       |
| Reed-Embleton et al.[48]        | Yes       | No  | CD | CD  | NA | Yes | CD | NA  | Yes | Poor                      | Poor       |
| Chuang et al.[49]               | Yes       | Yes | CD | CD  | NA | Yes | CD | NA  | Yes | Fair                      | Fair       |
| Olivari et al.[50]              | Yes       | Yes | CD | CD  | NA | Yes | CD | NA  | Yes | Fair                      | Fair       |
| Zanoni et al.[52]               | Yes       | Yes | CD | CD  | NA | Yes | CD | NA  | Yes | Fair                      | Fair       |
| Kirienko et al.[53]             | Yes       | Yes | CD | CD  | NA | Yes | CD | NA  | Yes | Fair                      | Fair       |
| Playe et al.[54]                | Yes       | Yes | CD | CD  | NA | Yes | CD | NA  | Yes | Fair                      | Fair       |
| Colandrea et al.[55]            | Yes       | Yes | NR | Yes | NA | Yes | CD | Yes | Yes | Fair                      | Fair       |
| Scarlattai et al.[32]           | Yes       | Yes | NA | Yes | NA | Yes | CD | NA  | Yes | Fair                      | Fair       |
| Martineau et al.[57]            | Yes       | Yes | CD | CD  | NA | Yes | CD | NA  | Yes | Fair                      | Fair       |
| Zou et al.[16]                  | Yes       | Yes | CD | CD  | NA | Yes | CD | NA  | Yes | Fair                      | Fair       |
| Kreps et al.[58]                | Yes       | Yes | CD | CD  | NA | Yes | CD | NA  | Yes | Fair                      | Fair       |

Note—NR = not reported, CD = cannot determine, NA = not applicable.

\*The NIH Quality Assessment Tool for Case Series Studies[14] poses nine questions: 1 = Was the study question or objective clearly stated?, 2 = Was the study population clearly and fully described, including a case definition?, 3 = Were the cases consecutive?, 4 = Were the subjects comparable?, 5 = Was the intervention clearly described?, 6 = Were the outcome measures clearly defined, valid, reliable, and implemented consistently across all study participants?, 7 = Was the length of follow-up adequate?, 8 = Were the statistical methods well-described?, 9 = Were

the results well-described? (Source: National Heart, Lung, and Blood Institute; National Institutes of Health; U.S. Department of Health and Human Services)
