# Supplementary material
Source: PubMed Central journal article supplement (PMC7598766)
Supplement: mmc2.pdf [file mmc2.pdf]

**Suppl. Table 2** Quality ratings of included studies according to Newcastle-Ottawa Scale (NOS) quality assessment tool for cohort studies[15]

| <b>Modified Newcastle-Ottawa Scale<sup>#</sup></b> |                  |                      |                |                    |                   |
|----------------------------------------------------|------------------|----------------------|----------------|--------------------|-------------------|
| <b>Studies<br/>First author (Reference No.)</b>    | <b>Selection</b> | <b>Comparability</b> | <b>Outcome</b> | <b>Total score</b> |                   |
|                                                    |                  |                      |                | <b>Reviewer 1</b>  | <b>Reviewer 2</b> |
| Albano et al.[44]                                  | **               | **                   | **             | Fair               | Fair              |
| Setti et al.[51]                                   | **               | **                   | **             | Fair               | Fair              |

<sup>#</sup>Good quality: 3 or 4 stars in selection domain AND 1 or 2 stars in comparability domain AND 2 or 3 stars in outcome/exposure domain; Fair quality: 2 stars in selection domain AND 1 or 2 stars in comparability domain AND 2 or 3 stars in outcome/exposure domain; Poor quality: 0 or 1 star in selection domain OR 0 stars in comparability domain OR 0 or 1 stars in outcome/exposure domain
