# Supplementary material
Source: PubMed Central journal article supplement (PMC7598766)
Supplement: mmc3.pdf [file mmc3.pdf]

## **Appendix 1**

("coronavirus 2" OR "coronavirus infections" OR "COVID-19" OR "coronavirus" OR "COVID-19" OR "2019-nCoV" OR "COVID-2019" OR "COVID19" OR "nCoV" OR (coronavirus AND "disease 2019") OR (2019 novel AND "coronavirus") OR "severe acute respiratory syndrome" OR "SARS-CoV-19" OR "SARS-CoV-2" OR "2019-CoV-19" OR "SARS-CoV" OR "2019nCoV" OR "coronavirinae") AND ((Positron AND emission AND tomography) OR ("Positron-Emission" AND Tomography) OR "Positron-Emission Tomography" OR (Positron AND Emission AND Tomography AND Computed AND Tomography) OR "Positron Emission Tomography Computed Tomography" OR "PET" OR "PET/CT\*" OR "FDG-PET")
